# Supplementary material for: Stroke in Coronavirus Disease 2019: A Systematic Review
Source: PubMed Central journal article supplement — J Stroke. 2020 Sep 29;22(3):324–35. doi: 10.5853/jos.2020.02264 (PMC7568983; doi:10.5853/jos.2020.02264), 2020-09-29
Supplement: jos-2020-02264-suppl1.pdf [file jos-2020-02264-suppl1.pdf]

**Supplementary Table 1.** Study assessment according to Oxford Centre for Evidence-based Medicine's Levels of Evidence and Grades of Recommendation<sup>1\*</sup>

| Study                               | Study type                        | Therapy/<br>prevention/<br>etiology/harm | Diagnosis | Prognosis | Differential<br>diagnosis/symptom<br>prevalence | Economic/decision<br>analysis |
|-------------------------------------|-----------------------------------|------------------------------------------|-----------|-----------|-------------------------------------------------|-------------------------------|
| Beyrouti et al. <sup>2</sup>        | Case Series                       | IV                                       | NA        | IC        | IV                                              | NA                            |
| Viguiet et al. <sup>3</sup>         | Case report                       | IV                                       | NA        | IC        | IV                                              | NA                            |
| Avula et al. <sup>4</sup>           | Retrospective observational study | IIB                                      | NA        | IIB       | IIB                                             | NA                            |
| Zhou et al. <sup>5</sup>            | Case report                       | IV                                       | NA        | IC        | IV                                              | NA                            |
| Sharifi-Razavi et al. <sup>6</sup>  | Case report                       | IV                                       | NA        | IC        | IV                                              | NA                            |
| Zhang et al. <sup>7</sup>           | Case series                       | IV                                       | NA        | IC        | IV                                              | NA                            |
| Morassi et al. <sup>8</sup>         | Case series                       | IV                                       | NA        | IC        | IV                                              | NA                            |
| Helms et al. <sup>9</sup>           | Prospective cohort study          | IIB                                      | NA        | IIB       | IIB                                             | NA                            |
| González-Pinto et al. <sup>10</sup> | Case report                       | IV                                       | NA        | IC        | IV                                              | NA                            |
| Oxley et al. <sup>11</sup>          | Case series                       | IV                                       | NA        | IC        | IV                                              | NA                            |
| Klok et al. <sup>12</sup>           | Retrospective observational study | IIB                                      | NA        | IIB       | IV                                              | NA                            |
| Al Saiegh et al. <sup>13</sup>      | Case series                       | IV                                       | NA        | IC        | IV                                              | NA                            |
| Zhai et al. <sup>14</sup>           | Case report                       | IV                                       | NA        | IC        | IV                                              | NA                            |
| Yaghi et al. <sup>15</sup>          | Retrospective observational study | IIB                                      | NA        | IIB       | IIB                                             | NA                            |
| Valderrama et al. <sup>16</sup>     | Case report                       | IV                                       | NA        | IC        | IV                                              | NA                            |
| He et al. <sup>17</sup>             | Case report                       | IV                                       | NA        | IC        | IV                                              | NA                            |
| Li et al. <sup>18</sup>             | Retrospective observational study | IIB                                      | NA        | IIB       | IIB                                             | NA                            |
| Mao et al. <sup>19</sup>            | Retrospective observational study | IIB                                      | NA        | IIB       | IIB                                             | NA                            |
| Helms et al. <sup>20</sup>          | Retrospective observational study | IIB                                      | NA        | IIB       | IIB                                             | NA                            |
| Lodigiani et al. <sup>21</sup>      | Retrospective observational study | IIB                                      | NA        | IIB       | IIB                                             | NA                            |
| Tunç et al. <sup>22</sup>           | Case series                       | IV                                       | NA        | IC        | IV                                              | NA                            |
| Muhammad et al. <sup>23</sup>       | Case report                       | IV                                       | NA        | IC        | IV                                              | NA                            |
| Garaci et al. <sup>24</sup>         | Case report                       | IV                                       | NA        | IC        | IV                                              | NA                            |
| Moshayedi et al. <sup>25</sup>      | Case report                       | IV                                       | NA        | IC        | IV                                              | NA                            |
| Zulfiqar et al. <sup>26</sup>       | Case report                       | IV                                       | NA        | IC        | IV                                              | NA                            |
| Chen et al. <sup>27</sup>           | Case report                       | IV                                       | NA        | IC        | IV                                              | NA                            |
| Co et al. <sup>28</sup>             | Case report                       | IV                                       | NA        | IC        | IV                                              | NA                            |
| Deliwala et al. <sup>29</sup>       | Case report                       | IV                                       | NA        | IC        | IV                                              | NA                            |
| Goldberg et al. <sup>30</sup>       | Case report                       | IV                                       | NA        | IC        | IV                                              | NA                            |
| Dahl-Cruz et al. <sup>31</sup>      | Case report                       | IV                                       | NA        | IC        | IV                                              | NA                            |

NA, not available.

\*Rated from IA to V based on Oxford Centre for Evidence-based Medicine's Levels of Evidence and Grades of Recommendation.
