# Supplementary material for: Stroke in Coronavirus Disease 2019: A Systematic Review
Source: PubMed Central journal article supplement — J Stroke. 2020 Sep 29;22(3):324–35. doi: 10.5853/jos.2020.02264 (PMC7568983; doi:10.5853/jos.2020.02264), 2020-09-29
Supplement: jos-2020-02264-suppl2.pdf [file jos-2020-02264-suppl2.pdf]

**Supplementary Table 2.** Results of search for various keyword sets

| Keywords                               | PubMed searches     |                      | Scopus, Embase, and Web of Science searches |                      |
|----------------------------------------|---------------------|----------------------|---------------------------------------------|----------------------|
|                                        | Relevant            | Not relevant         | Relevant                                    | Not relevant         |
| Thrombolysis and COVID-19              | 5                   | 45                   | 1                                           | 24 (13 duplicates)   |
| Thrombectomy and COVID-19              | 5 (all duplicates)  | 29 (18 duplicates)   | 3 (all duplicates)                          | 11 (9 duplicates)    |
| Thrombolysis and SARS-CoV-2            | 5 (all duplicates)  | 26 (all duplicates)  | 0                                           | 7 (all duplicates)   |
| Thrombectomy and SARS-CoV-2            | 6 (5 duplicates)    | 14 (7 duplicates)    | 0                                           | 1 (duplicate)        |
| Stroke imaging and COVID-19            | 15 (5 duplicates)   | 95 (11 duplicates)   | 3 (all duplicates)                          | 5 (11 duplicates)    |
| SARS-CoV-2 and stroke                  | 23 (19 duplicates)  | 150 (49 duplicates)  | 6 (4 duplicates)                            | 33 (28 duplicates)   |
| SARS-CoV-2 and neurology               | 27 (20 duplicates)  | 95 (23 duplicates)   | 3 (all duplicates)                          | 46 (43 duplicates)   |
| SARS-CoV-2 and ischemic stroke         | 28 (26 duplicates)  | 50 (44 duplicates)   | 1 (all duplicate)                           | 7 (6 duplicates)     |
| SARS-CoV-2 and ICH                     | 17 (16 duplicates)  | 45 (19 duplicates)   | 0                                           | 2 (1 duplicate)      |
| SARS-CoV-2 and cerebrovascular disease | 24 (all duplicates) | 143 (56 duplicates)  | 1 (all duplicate)                           | 18 (17 duplicates)   |
| SARS COV2 and intracerebral hemorrhage | 5 (all duplicates)  | 29 (all duplicates)  | 0                                           | 0                    |
| COVID-19 and stroke                    | 34 (27 duplicates)  | 341 (306 duplicates) | 30 (28 duplicates)                          | 178 (158 duplicates) |
| COVID-19 and neurology                 | 34 (30 duplicates)  | 185 (174 duplicates) | 12 (all duplicates)                         | 151 (87 duplicates)  |
| COVID-19 and ischemic stroke           | 31 (all duplicates) | 105 (97 duplicates)  | 8 (all duplicates)                          | 51 (33 duplicates)   |
| COVID-19 and ICH                       | 21 (all duplicates) | 119 (79 duplicates)  | 4 (all duplicates)                          | 9 (4 duplicates)     |
| COVID-19 and cerebrovascular disease   | 21 (all duplicates) | 211 (199 duplicates) | 19 (all duplicates)                         | 103 (68 duplicates)  |
| COVID-19 and intracerebral hemorrhage  | 8 (all duplicates)  | 71 (all duplicates)  | 2 (all duplicates)                          | 2 (1 duplicate)      |

COVID-19, coronavirus disease 2019; SARS-CoV-2, severe acute respiratory syndrome coronavirus 2; ICH, intracerebral haemorrhage.
