# Supplementary material for: Stroke in Coronavirus Disease 2019: A Systematic Review
Source: PubMed Central journal article supplement — J Stroke. 2020 Sep 29;22(3):324–35. doi: 10.5853/jos.2020.02264 (PMC7568983; doi:10.5853/jos.2020.02264), 2020-09-29
Supplement: jos-2020-02264-suppl4.pdf [file jos-2020-02264-suppl4.pdf]

**Supplementary Table 4.** Clinical status of patients who were still hospitalised at the time of publication of corresponding articles

| Name of the study*                   | No. of still hospitalized patients at the time of publication (%) | Basic demographic features and type of stroke of individual patients                   | Clinical status of individual patients as available in the respective publications                                                                                                                                                      |
|--------------------------------------|-------------------------------------------------------------------|----------------------------------------------------------------------------------------|-----------------------------------------------------------------------------------------------------------------------------------------------------------------------------------------------------------------------------------------|
| Oxley et al. <sup>11</sup> (n=5)     | 2 (40)                                                            | 39-year-old male with posterior circulation IS caused by LAD and admission NIHSS of 16 | In ICU with multiorgan failure and was on mechanical ventilation and sedation                                                                                                                                                           |
|                                      |                                                                   | 44-year-old male with anterior circulation IS caused by LAD with admission NIHSS of 23 | In a stroke unit with NIHSS of 19 on day 12 of admission                                                                                                                                                                                |
| Al Saiegh et al. <sup>13</sup> (n=2) | 1 (50)                                                            | 62-year-old female with anterior circulation IS caused by LAD                          | She was initially discharged and later readmitted with altered sensorium. Imaging showed haemorrhagic transformation with obstructive hydrocephalus. Tracheostomized with poor Glasgow coma scale and extra ventricular drain in place. |
| Lodigiani et al. <sup>21</sup> (n=9) | 3 (33.33)                                                         | 68-year-old male with IS                                                               | In general ward. Further details about clinical status not mentioned.                                                                                                                                                                   |
|                                      |                                                                   | 69-year-old male with IS caused by LAD                                                 | In ICU. Further details about clinical status not mentioned.                                                                                                                                                                            |
|                                      |                                                                   | 57-year-old male with IS                                                               | In ICU and also had necrotising meningoencephalitis. Further details about clinical status not mentioned.                                                                                                                               |
| Yaghi et al. <sup>15</sup> (n=32)    | 10 (31.3)                                                         | 60-year-old with cryptogenic IS                                                        | Critically ill (no further characterisation of outcome available)                                                                                                                                                                       |
|                                      |                                                                   | 70-year-old with cardioembolic IS                                                      | Critically ill (no further characterisation of outcome available)                                                                                                                                                                       |
|                                      |                                                                   | 40-year-old with cryptogenic IS                                                        | Critically ill (no further characterisation of outcome available)                                                                                                                                                                       |
|                                      |                                                                   | 50-year-old with cryptogenic IS                                                        | Critically ill (no further characterisation of outcome available)                                                                                                                                                                       |
|                                      |                                                                   | 60-year-old with cryptogenic IS                                                        | Critically ill (no further characterisation of outcome available)                                                                                                                                                                       |
|                                      |                                                                   | 60-year-old with watershed IS due to hypotension                                       | Critically ill (no further characterisation of outcome available)                                                                                                                                                                       |
|                                      |                                                                   | 70-year-old with watershed IS due to hypotension                                       | Critically ill (no further characterisation of outcome available)                                                                                                                                                                       |
|                                      |                                                                   | 40-year-old with cryptogenic IS                                                        | Critically ill (no further characterisation of outcome available)                                                                                                                                                                       |
|                                      |                                                                   | 50-year-old with cryptogenic IS                                                        | Critically ill (no further characterisation of outcome available)                                                                                                                                                                       |
| 60-year-old with cryptogenic IS      | Critically ill (no further characterisation of outcome available) |                                                                                        |                                                                                                                                                                                                                                         |
| Co et al. <sup>28</sup> (n=1)        | 1 (100)                                                           | 62-year-old female with IS caused by LAD                                               | In ICU being managed for COVID-19 infection with NIHSS of 4                                                                                                                                                                             |

IS, ischaemic stroke; LAD, large artery disease; NIHSS, National Institutes of Health Stroke Scale; ICU, intensive care unit; COVID-19, coronavirus disease 2019. \*Number of patients with stroke in each study.
