# Supplementary material for: Stroke in Coronavirus Disease 2019: A Systematic Review
Source: PubMed Central journal article supplement — J Stroke. 2020 Sep 29;22(3):324–35. doi: 10.5853/jos.2020.02264 (PMC7568983; doi:10.5853/jos.2020.02264), 2020-09-29
Supplement: jos-2020-02264-suppl5.pdf [file jos-2020-02264-suppl5.pdf]

**Supplementary Table 5.** Comparison of survivors and non-survivors assuming worst case scenario\*

| Variable                                                | Survivors (n=38) | Non-survivors (n=52) | P <sup>†</sup>        | OR (95% CI) <sup>‡</sup>   |
|---------------------------------------------------------|------------------|----------------------|-----------------------|----------------------------|
| Age (n=90) (yr)                                         | 60.5±16.6        | 63.2±13.9            | 0.49                  | 1 (0.98–1)                 |
| Sex (n=57)                                              |                  |                      | 0.2                   | 0.5 (0.2–1.5)              |
| Female                                                  | 15 (26.3)        | 9 (15.8)             |                       |                            |
| Male                                                    | 15 (26.3)        | 18 (31.6)            |                       |                            |
| Symptomatic for COVID-19 at the time of stroke (n=77)   | 27 (35.1)        | 37 (48.1)            | 0.79                  | 1.2 (0.35–3.9)             |
| Type of stroke (n=90)                                   |                  |                      | 0.1                   | 1.8 (0.5–6.3) <sup>§</sup> |
| Ischaemic stroke                                        | 32 (35.6)        | 47 (52.2)            |                       |                            |
| Intracerebral haemorrhage                               | 0 (0)            | 4 (4.4)              |                       |                            |
| Intracerebral haemorrhage with subarachnoid haemorrhage | 2 (2.2)          | 1 (1.1)              |                       |                            |
| Cerebral venous thrombosis                              | 2 (2.2)          | 0 (0)                |                       |                            |
| Subarachnoid haemorrhage                                | 1 (1.1)          | 0 (0)                |                       |                            |
| Transient ischaemic attack                              | 1 (1.1)          | 0 (0)                |                       |                            |
| NIHSS (n=16)                                            | 11.5 (4.5–16.8)  | 10 (2–26.3)          | 0.59                  | 1 (0.9–1.2)                |
| TOAST (n=67)                                            |                  |                      | 0.057                 |                            |
| Large artery disease                                    | 12 (17.9)        | 12 (17.9)            |                       | 0.67 (0.1–3)               |
| Small vessel disease                                    | 5 (7.5)          | 1 (1.5)              |                       | 0.1 (0.01–1.6)             |
| Cardioembolic                                           | 4 (5.9)          | 6 (8.9)              |                       | 1.5 (0.4–5.3)              |
| Other                                                   | 0 (0)            | 4 (5.9)              |                       | NA                         |
| Cryptogenic                                             | 6 (8.9)          | 17 (25.4)            |                       | 1.9 (0.4–9.1)              |
| Critical illness (n=90)                                 |                  |                      | <0.0001 <sup>  </sup> |                            |
| No                                                      | 21 (23.3)        | 3 (3.3)              |                       | 0.1 (0.04–0.5)             |
| Yes                                                     | 17 (18.9)        | 49 (54.5)            |                       | 20.2 (5.3–76.3)            |
| Chest X-ray (n=9)                                       |                  |                      | 0.86                  | NA                         |
| Normal                                                  | 1 (11.1)         | 1 (11.1)             |                       |                            |
| Abnormal                                                | 3 (33.3)         | 4 (44.4)             |                       |                            |
| Abnormal CT chest (n=38)                                | 20 (52.6)        | 18 (47.4)            | NA                    | NA                         |
| Abnormal CT pulmonary angiography (n=3)                 | 1 (33.3)         | 1 (33.3)             | 0.39                  | NA                         |
| Risk factors                                            |                  |                      |                       |                            |
| Hypertension (n=89)                                     | 14 (15.7)        | 21 (23.6)            | 0.68                  | 1.2 (0.5–2.8)              |
| Diabetes (n=89)                                         | 7 (7.9)          | 13 (14.6)            | 0.43                  | 1.5 (0.5–4.3)              |
| Old stroke (n=89)                                       | 1 (1.1)          | 3 (3.4)              | 0.5                   | 2.3 (0.2–27)               |
| Smoking (n=53)                                          | 2 (3.8)          | 6 (11.3)             | 0.087                 | 4.1 (0.7–23)               |
| Atrial fibrillation (n=88)                              | 4 (4.5)          | 6 (6.8)              | 0.83                  | 1.2 (0.3–4.4)              |
| Heart failure (n=88)                                    | 0 (0)            | 4 (4.5)              | 0.07                  | NA                         |
| Pacemaker (n=88)                                        | 0 (0)            | 1 (1.1)              | 0.38                  | NA                         |
| Dyslipidemia (n=82)                                     | 6 (7.3)          | 17 (20.7)            | 0.04 <sup>  </sup>    | 2.9 (1–8.5)                |
| Coronary artery disease (n=88)                          | 1 (1.1)          | 6 (6.8)              | 0.1                   | 5 (0.6–43.8)               |
| Alcoholism (n=48)                                       | 1 (2.1)          | 1 (2.1)              | 0.86                  | 1.3 (0.1–22)               |
| No. of risk factors (n=89)                              |                  |                      | 0.002 <sup>  </sup>   |                            |
| 0                                                       | 16 (17.9)        | 6 (6.7)              |                       | 0.4 (0.2–0.9)              |
| 1                                                       | 7 (7.9)          | 8 (8.9)              |                       | 3 (0.8–12.1)               |
| ≥2                                                      | 15 (16.9)        | 37 (41.6)            |                       | 6.6 (2.2–20)               |
| Comorbidities                                           |                  |                      |                       |                            |
| Chronic kidney disease (n=10)                           | 1 (10)           | 0 (0)                | 0.49                  | NA                         |
| Cancer (n=12)                                           | 1 (8)            | 1 (8)                | 0.79                  | 1.5 (0.1–32)               |

Supplementary Table 5. Continued

| Variable                                     | Survivors (n=38)   | Non-survivors (n=52) | P <sup>†</sup>       | OR (95% CI) <sup>‡</sup>   |
|----------------------------------------------|--------------------|----------------------|----------------------|----------------------------|
| C-reactive protein (n=54) (mg/L)             | 81±95              | 145±102              | 0.009 <sup>  </sup>  | 2.7 (0.8–8.3) <sup>‡</sup> |
| D-dimer (n=60) (µg/L)                        | 3,180±3,658        | 7,514±10,308         | 0.006 <sup>  </sup>  | 2.7 (0.9–8.1)**            |
| Ferritin (n=12) (µg/L)                       | 241±228            | 2,253±1,611          | 0.0066 <sup>  </sup> | NA <sup>††</sup>           |
| Leucocyte count (n=20) (×10 <sup>9</sup> /L) | 8.3±3              | 12.6±7               | 0.2                  | 4 (0.6–29.1)               |
| Lymphocyte (n=16) (×10 <sup>9</sup> /L)      | 1±0.5              | 0.99±0.7             | 0.71                 | 0.6 (0.1–4.4)              |
| Platelet (n=17) (×10 <sup>9</sup> /L)        | 245±93             | 226±120              | 0.3                  | NA                         |
| Creatinine (n=11) (µmol/L)                   | 113±45             | 162±133              | 1                    | 1.2 (0.1–20)               |
| Aspartate transaminase (n=11) (U/L)          | 50±37              | 69±48                | 0.71                 | 1.3 (0.1–16)               |
| Alanine transaminase (n=9) (U/L)             | 31±18              | 39±21                | 0.6                  | NA                         |
| Procalcitonin (n=5) (µg/L)                   | 0.08 <sup>§§</sup> | 4.68±6.4             | 0.16                 | NA                         |
| Troponin (n=16) (pg/mL)                      | 310±348            | 2,245±4,904          | 0.16                 | 1.2 (0.7–20)               |
| Lactate dehydrogenase (n=12) (U/L)           | 302±99             | 761±235              | 0.01 <sup>  </sup>   | NA <sup>††</sup>           |
| aPTT (n=10) (sec)                            | 26±14              | 37±10                | 0.25                 | 2.67 (0.2–45)              |
| International normalized ratio (n=6)         | 1.2±0              | 1.95±1.1             | 0.35                 | NA                         |
| Prothrombin time (n=6)                       | 13.9±1.1           | 13.7±0.8             | 0.83                 | NA                         |
| Fibrinogen (n=9) (g/L)                       | 4.9±1.9            | 6.3±1.6              | 0.44                 | NA                         |
| APLA positivity (n=4)                        | 0 (0)              | 0 (0)                | NA                   | NA                         |
| Lupus anticoagulant (n=2)                    | 0 (0)              | 1 (50)               | NA                   | NA                         |

Values are presented as mean±standard deviation, number (%), or median (interquartile range).

OR, odds ratio; CI, confidence interval; COVID-19, coronavirus disease 2019; NIHSS, National Institutes of Health Stroke Scale; TOAST, Trial of ORG 10172 in Acute Stroke Treatment; NA, not applicable; CT, computed tomography; aPTT, activated partial thromboplastin time; APLA, antiphospholipid antibody.

\*Data is not uniformly available for each patient leading to separate 'n' number for each characteristic; <sup>†</sup>Chi-square test was used for categorical variables and Mann-Whitney test was used for continuous variables to calculate P-value unless otherwise specified; <sup>‡</sup>ORs were calculated by logistic regression. The cut-off values used for calculating ORs were upper or lower limits of normal values (whichever differentiates normal from abnormal values) unless otherwise specified; <sup>§</sup>OR was calculated for ischaemic stroke when compared with non-ischaemic stroke; <sup>||</sup> The difference between the groups was statistically significant; <sup>‡</sup>A C-reactive protein (CRP) cut-off value of 100 mg/L was used arbitrarily to calculate the OR. The difference between the groups for CRP was significant by Mann-Whitney test even though the CI for OR included 1; <sup>\*\*</sup>D-dimer cut-off of 4,000 µg/L was used arbitrarily to calculate OR; <sup>††</sup>One of the cells in the contingency table used to calculate OR at a cut-off of 300 µg/L of serum ferritin had null value precluding the calculation of the same. Only single observation was available; <sup>\*\*</sup>One of the cells in the contingency table used to calculate OR at a cut-off of 280 U/L of lactate dehydrogenase had null value precluding the calculation of the same; <sup>§§</sup>Only single observation was available.
