# Supplementary material for: Stroke in Coronavirus Disease 2019: A Systematic Review
Source: PubMed Central journal article supplement — J Stroke. 2020 Sep 29;22(3):324–35. doi: 10.5853/jos.2020.02264 (PMC7568983; doi:10.5853/jos.2020.02264), 2020-09-29
Supplement: jos-2020-02264-suppl6.pdf [file jos-2020-02264-suppl6.pdf]

## Supplementary References

1. Oxford Centre for Evidence-based Medicine: Levels of Evidence (March 2009). CEBM. <https://www.cebm.net/2009/06/oxford-centre-evidence-based-medicine-levels-evidence-march-2009>. Accessed August 21,2020.
2. Beyrouti R, Adams ME, Benjamin L, Cohen H, Farmer SF, Goh YY, et al. Characteristics of ischaemic stroke associated with COVID-19. *J Neurol Neurosurg Psychiatry* 2020;91:889-891.
3. Viguier A, Delamarre L, Duplantier J, Olivot JM, Bonneville F. Acute ischemic stroke complicating common carotid artery thrombosis during a severe COVID-19 infection. *J Neuroradiol* 2020;47:393-394.
4. Avula A, Nalleballe K, Narula N, Sapozhnikov S, Dandu V, Toom S, et al. COVID-19 presenting as stroke. *Brain Behav Immun* 2020;87:115-119.
5. Zhou B, She J, Wang Y, Ma X. A case of coronavirus disease 2019 with concomitant acute cerebral infarction and deep vein thrombosis. *Front Neurol* 2020;11:296.
6. Sharifi-Razavi A, Karimi N, Rouhani N. COVID-19 and intracerebral haemorrhage: causative or coincidental? *New Microbes New Infect* 2020;35:100669.
7. Zhang Y, Xiao M, Zhang S, Xia P, Cao W, Jiang W, et al. Coagulopathy and antiphospholipid antibodies in patients with Covid-19. *N Engl J Med* 2020;382:e38.
8. Morassi M, Bagatto D, Cobelli M, D'Agostini S, Gigli GL, Bnà C, et al. Stroke in patients with SARS-CoV-2 infection: case series. *J Neurol* 2020;267:2185-2192.
9. Helms J, Tacquard C, Severac F, Leonard-Lorant I, Ohana M, Delabranche X, et al. High risk of thrombosis in patients with severe SARS-CoV-2 infection: a multicenter prospective cohort study. *Intensive Care Med* 2020;46:1089-1098.
10. González-Pinto T, Luna-Rodríguez A, Moreno-Estébanez A, Agirre-Beitia G, Rodríguez-Antigüedad A, Ruiz-Lopez M. Emergency room neurology in times of COVID-19: malignant ischaemic stroke and SARS-CoV-2 infection. *Eur J Neurol* 2020;27:e35-e36.
11. Oxley TJ, Mocco J, Majidi S, Kellner CP, Shoirah H, Singh IP, et al. Large-vessel stroke as a presenting feature of Covid-19 in the young. *N Engl J Med* 2020;382:e60.
12. Klok FA, Kruip MJ, van der Meer NJM, Arbous MS, Gommers DA, Kant KM, et al. Incidence of thrombotic complications in critically ill ICU patients with COVID-19. *Thromb Res* 2020;191:145-147.
13. Al Saiegh F, Ghosh R, Leibold A, Avery MB, Schmidt RF, Theofanis T, et al. Status of SARS-CoV-2 in cerebrospinal fluid of patients with COVID-19 and stroke. *J Neurol Neurosurg Psychiatry* 2020;91:846-848.
14. Zhai P, Ding Y, Li Y. The impact of COVID-19 on ischemic stroke. *Diagn Pathol* 2020;15:78.
15. Yaghi S, Ishida K, Torres J, Mac Grory B, Raz E, Humbert K, et al. SARS-CoV-2 and stroke in a New York Healthcare System. *Stroke* 2020;51:2002-2011.
16. Valderrama EV, Humbert K, Lord A, Frontera J, Yaghi S. Severe acute respiratory syndrome coronavirus 2 infection and ischemic stroke. *Stroke* 2020;51:e124-e127.
17. He J, Cheng G, Xu W, Zhang L, Zeng Z. Diagnosis and treatment of an elderly patient with secondary cerebral infarction caused by COVID-19. *Nan Fang Yi Ke Da Xue Xue Bao* 2020;40:351-352.
18. Li Y, Li M, Wang M, Zhou Y, Chang J, Xian Y, et al. Acute cerebrovascular disease following COVID-19: a single center, retrospective, observational study. *Stroke Vasc Neurol* 2020;svn-2020-000431.
19. Mao L, Jin H, Wang M, Hu Y, Chen S, He Q, et al. Neurologic manifestations of hospitalized patients with coronavirus disease 2019 in Wuhan, China. *JAMA Neurol* 2020;77:1-9.
20. Helms J, Kremer S, Merdji H, Clere-Jehl R, Schenck M, Kummerlen C, et al. Neurologic features in severe SARS-CoV-2 infection. *N Engl J Med* 2020;382:2268-2270.
21. Lodigiani C, Lapichino G, Carenzo L, Cecconi M, Ferrazzi P, Sebastian T, et al. Venous and arterial thromboembolic complications in COVID-19 patients admitted to an academic hospital in Milan, Italy. *Thromb Res* 2020;191:9-14.
22. Tunç A, Ünlübaşı Y, Alemdar M, Akyüz E. Coexistence of COVID-19 and acute ischemic stroke report of four cases. *J Clin Neurosci* 2020;77:227-229.
23. Muhammad S, Petridis A, Cornelius JF, Hänggi D. Letter to editor: severe brain haemorrhage and concomitant COVID-19 infection: a neurovascular complication of COVID-19. *Brain Behav Immun* 2020;87:150-151.
24. Garaci F, Di Giuliano F, Picchi E, Da Ros V, Floris R. Venous cerebral thrombosis in COVID-19 patient. *J Neurol Sci* 2020;414:116871.
25. Moshayedi P, Ryan TE, Mejia LL, Nour M, Liebeskind DS. Triage of acute ischemic stroke in confirmed COVID-19: large vessel occlusion associated with coronavirus infection. *Front Neurol* 2020;11:353.
26. Zulfiqar AA, Lorenzo-Villalba N, Hassler P, Andrés E. Immune thrombocytopenic purpura in a patient with COVID-19. *N Engl J Med* 2020;382:e43.
27. Chen S, Hu B, Li H, Xia Y, Zhang Y, Mao L, et al. COVID-19 with acute cerebral infarction: one case report. *Chin J Neurol* 2020;53:309-311.
28. Co CO, Yu JR, Laxamana LC, David-Ona DI. Intravenous thrombolysis for stroke in a COVID-19 positive Filipino pa-

- tient, a case report. *J Clin Neurosci* 2020;77:234-236.
29. Deliwala S, Abdulhamid S, Abusalih MF, Al-Qasmi MM, Bachuwa G. Encephalopathy as the sentinel sign of a cortical stroke in a patient infected with coronavirus disease-19 (COVID-19). *Cureus* 2020;12:e8121.
  30. Goldberg MF, Goldberg MF, Cerejo R, Tayal AH. Cerebrovascular disease in COVID-19. *AJNR Am J Neuroradiol* 2020; 41:1170-1172.
  31. Dahl-Cruz F, Guevara-Dalrymple N, López-Hernández N. Cerebral venous thrombosis and SARS-CoV-2 infection. *Rev Neurol* 2020;70:391-392.
